# Supplementary material for: Toward environmentally sustainable aquafeeds
Source: Oxford University Press journal article supplement (doi:10.1525/elementa.2020.00170), 2021-01-01
Supplement: fish_biomass_by_tank.xlsx [file fish_biomass_by_tank.xlsx]

## Sheet: Fish biomass
	No Fish	Tank 1 (g)	Tank 2 (g)	Tank 3 (g)	Tank 4 (g)	Tank 5 (g)	Tank 6 (g)	Tank 7 (g)	Tank 8 (g)	Tank 9 (g)	Tank 10 (g)	Tank 11 (g)	Tank 12 (g)
	3	96	82	78	88	92	118	92	84	100	82	96	84
	3	54	50	70	48	56	62	50	74	48	72	78	82
	3	86	100	100	86	78	68	98	94	76	72	58	64
	3	58	48	50	48	44	48	44	48	44	44	46	48
	3	38	44	40	38	54	42	46	42	39	37	48	48
Total biomass	15	332	324	338	308	324	338	330	342	307	307	326	326
Mean biomass		22.1333	21.6	22.5333	20.5333	21.6	22.5333	22	22.8	20.4667	20.4667	21.7333	21.7333
						Diet
		Control			Spirulina			Chlorella			Scizochitrium
Tank (dietary group)	2A	4 A	7A	8 B	10 B	12 B	3 C	6 C	9 C	1 D	5 D	11 D			Indices	Control A	Spirulina (B)	Chlorella C	Scizochitrium D)
Initial wt (g)	21.6	20.5	22	22.8	20.5	21.7	22.5	22.5	20.5	22.1	21.6	21.7			Initial biomass	21.3667	21.6667	21.8333	21.8
Final wt (g)	35.5	35.85	35.33	32.93	35.2	35.46	35.73	36.26	31.06	40.76	35.71	36.42			Final biomass	35.56	34.53	34.35	37.63
Wt gain (%)	64.3519	74.878	60.5909	44.4298	71.7073	63.4101	58.8	61.1556	51.5122	84.4344	65.3241	67.8341			% wt gain	66.6069	59.8491	57.1559	72.5309
Feed fed (g)
FCR
SGR
Remained fish (no)	12	14	15	15	15	15	15	15	15	13	14	14
Survival	80	93.3333	100	100	100	100	100	100	100	86.6667	93.3333	93.3333

## Sheet: Sampling 3 April-P budget
Tank	No of fish	Total biomass (g)	Mean biomass (g)
Tank 1	13	530	40.7692
tank 2	12	426	35.5
Tank 3	15	536	35.7333
Tank 4	14	502	35.8571
Tank 5	14	500	35.7143
Tank 6	15	544	36.2667
Tank 7	15	530	35.3333
Tank 8	15	494	32.9333
Tank 9	15	466	31.0667
Tank 10	15	528	35.2
Tank 11	14	510	36.4286
Tank 12	15	532	35.4667
