# Supplementary material for: Toward environmentally sustainable aquafeeds
Source: Oxford University Press journal article supplement (doi:10.1525/elementa.2020.00170), 2021-01-01
Supplement: phosphorus_data_and_calculations_finalforelementa.xls [file phosphorus_data_and_calculations_finalforelementa.xls]

## Sheet: Metadata
Bold Blue indicates outlier - not used in calculations of averages or digestibility, regular blue indicates average that excludes at least one outlier
FEED
Label	Explanation
Sample #	Number of sample
Type	Water (for soluble phosphorus), Feed, Feces, IngredientMA (microalgae), IngredientFM (fishmeal), WBF (whole body fish)
Diet	A (reference), B (spirulina), C (chlorella), D (schizochytrium), spigot (for water samples)
Crucible #	Crucible ID
Empty Cup (g)	Weight of empty cup (g)
Wet Sample (g)	Weight of wet sample only (wet sample with cup - empty cup) (g)
Dry Sample with Cup (g)	Weight of dry sample and cup (g)
Dry Sample (g)	Weight of dry sample only (dry sample with cup - empty cup) (g)
Ash with Cup (g)	Weight of ashed sample (after muffle furnace) and empty cup (g)
Ash (g)	Weight of ashed sample only (ash with cup - empty cup) (g)
Digestion Volume	Volume of acid-digested solution (mL)
AIA with cup (g)	Weight of Acid-Insoluble-Ash and filter and cup after acid digestion (g)
AIA (g)	Weight of Acid-Insoluble-Ash only (AIA with cup - empty cup) (g)
% Phosphorus	% phosphorus in sample as determined by phosphorus analysis (Lachat)
% Dry Matter	Weight of dry sample expressed as a percentage of wet sample weight: (dry sample/wet sample)*100
% Moisture	Weight of moisture in wet sample expressed as a percentage of wet sample weight: [(wet sample -dry sample)/wet sample]
% Ash	Weight of ash expressed as a percentage of dry sample weight: (ash/dry sample)*100
% AIA	Weight of Acid-Insoluble-Ash expressed as a percentage of dry sample weight: (AIA/dry sample)*100
Mean %DryMatter	Mean of % dry matter for the three replicates
Mean %Ash	Mean of % ash for the three replicates
SD	Standard Deviation of Mean
CV (%)	Coefficient of Variation for Mean ((SD/mean)*100)
INGREDIENT
Label	Explanation
Sample #	Number of sample
Type	Water (for soluble phosphorus), Feed, Feces, IngredientMA (microalgae), IngredientFM (fishmeal), WBF (whole body fish)
Ingredient	Fish meal, Spirulina, Chlorella, Schizochytrium
Crucible #	Crucible ID
Empty Cup (g)	Weight of empty cup (g)
Wet Sample (g)	Weight of wet sample only (wet sample with cup - empty cup) (g)
Dry Sample with Cup (g)	Weight of dry sample and cup (g)
Dry Sample (g)	Weight of dry sample only (dry sample with cup - empty cup) (g)
Ash with Cup (g)	Weight of ashed sample (after muffle furnace) and empty cup (g)
Ash (g)	Weight of ashed sample only (ash with cup - empty cup) (g)
Digestion Volume	Volume of acid-digested solution (mL)
AIA with cup (g)	Weight of Acid-Insoluble-Ash and filter and cup after acid digestion (g)
AIA (g)	Weight of Acid-Insoluble-Ash only (AIA with cup - empty cup) (g)
% Phosphorus	% phosphorus in sample as determined by phosphorus analysis (Lachete?)
% Dry Matter	Weight of dry sample expressed as a percentage of wet sample weight: (dry sample/wet sample)*100
% Moisture	Weight of moisture in wet sample expressed as a percentage of wet sample weight: [(wet sample -dry sample)/wet sample]
% Ash	Weight of ash expressed as a percentage of dry sample weight: (ash/dry sample)*100
% AIA	Weight of Acid-Insoluble-Ash expressed as a percentage of dry sample weight: (AIA/dry sample)*100
Mean %DryMatter	Mean of % dry matter for the three replicates
Mean %Ash	Mean of % ash for the three replicates
SD	Standard Deviation of Mean
CV (%)	Coefficient of Variation for Mean ((SD/mean)*100)
FECES
Label	Explanation
Sample #	Number of sample
Type	Water (for soluble phosphorus), Feed, Feces, IngredientMA (microalgae), IngredientFM (fishmeal), WBF (whole body fish)
Diet	A (reference), B (spirulina), C (chlorella), D (schizochytrium), spigot (for water samples)
Tank #	1-12
Crucible #	Crucible ID
Empty Cup (g)	Weight of empty cup (g)
Wet Sample (g)	Weight of wet sample only (wet sample with cup - empty cup) (g)
Dry Sample with Cup (g)	Weight of dry sample and cup (g)
Dry Sample (g)	Weight of dry sample only (dry sample with cup - empty cup) (g)
Ash with Cup (g)	Weight of ashed sample (after muffle furnace) and empty cup (g)
Ash (g)	Weight of ashed sample only (ash with cup - empty cup) (g)
Digestion Volume	Volume of acid-digested solution (mL)
AIA with cup (g)	Weight of Acid-Insoluble-Ash and filter and cup after acid digestion (g)
AIA (g)	Weight of Acid-Insoluble-Ash only (AIA with cup - empty cup) (g)
% Phosphorus	% phosphorus in sample as determined by phosphorus analysis (Lachete?)
% Dry Matter	Weight of dry sample expressed as a percentage of wet sample weight: (dry sample/wet sample)*100
% Moisture	Weight of moisture in wet sample expressed as a percentage of wet sample weight: [(wet sample -dry sample)/wet sample]
% Ash	Weight of ash expressed as a percentage of dry sample weight: (ash/dry sample)*100
% AIA	Weight of Acid-Insoluble-Ash expressed as a percentage of dry sample weight: (AIA/dry sample)*100
Mean %DryMatter	Mean of % dry matter for the three replicates
Mean %Ash	Mean of % ash for the three replicates
SD	Standard Deviation of Mean
CV (%)	Coefficient of Variation for Mean ((SD/mean)*100)
WHOLE BODY FISH
Label	Explanation
Sample #	Number of sample
Type	Water (for soluble phosphorus), Feed, Feces, IngredientMA (microalgae), IngredientFM (fishmeal), WBF (whole body fish)
Diet	A (reference), B (spirulina), C (chlorella), D (schizochytrium), spigot (for water samples)
Tank #	1-12 (fish from tanks after experiment) or Initial (fish from before experiment)
Crucible #	Crucible ID
Empty Cup (g)	Weight of empty cup (g)
Wet Sample (g)	Weight of wet sample only (wet sample with cup - empty cup) (g)
Dry Sample with Cup (g)	Weight of dry sample and cup (g)
Dry Sample (g)	Weight of dry sample only (dry sample with cup - empty cup) (g)
Ash with Cup (g)	Weight of ashed sample (after muffle furnace) and empty cup (g)
Ash (g)	Weight of ashed sample only (ash with cup - empty cup) (g)
Digestion Volume	Volume of acid-digested solution (mL)
AIA with cup (g)	Weight of Acid-Insoluble-Ash and filter and cup after acid digestion (g)
AIA (g)	Weight of Acid-Insoluble-Ash only (AIA with cup - empty cup) (g)
% Phosphorus	% phosphorus in sample as determined by phosphorus analysis (Lachete?)
% Dry Matter	Weight of dry sample expressed as a percentage of wet sample weight: (dry sample/wet sample)*100
% Moisture	Weight of moisture in wet sample expressed as a percentage of wet sample weight: [(wet sample -dry sample)/wet sample]
% Ash	Weight of ash expressed as a percentage of dry sample weight: (ash/dry sample)*100
% AIA	Weight of Acid-Insoluble-Ash expressed as a percentage of dry sample weight: (AIA/dry sample)*100
Mean %DryMatter	Mean of % dry matter for the three replicates
Mean %Ash	Mean of % ash for the three replicates
SD	Standard Deviation of Mean
CV (%)	Coefficient of Variation for Mean ((SD/mean)*100)

## Sheet: Feed
Sample #	Type	Diet	Crucible #	Empty Cup (g)	Wet Sample (g)	Dry Sample with Cup (g)	Dry Sample (g)	Ash with Cup (g)	Ash (g)	Digestion Volume	AIA with cup (g)	AIA (g)	mg P/L H20	% Phosphorus	g/kg Phosphorus	% Dry Matter	% Moisture	% Ash	% AIA
1	Feed	A	22	42.0459	1.9471	43.8723	1.8264	42.2188	0.1729	250	42.0876	0.0417	62.5334	0.855965	8.55965	93.801	6.19896	9.46671	2.28318
2	Feed	A	21	41.8637	2.1447	43.8779	2.0142	42.0517	0.188	250	41.9113	0.0476	74.5865	0.925758	9.25758	93.9152	6.08477	9.33373	2.36322
3	Feed	A	20	46.2966	2.0501	48.2179	1.9213	46.4816	0.185	250	46.342	0.0454	59.123	0.76931	7.6931	93.7174	6.28262	9.6289	2.36298
4	Feed	B	12	41.6239	2.1363	43.6082	1.9843	41.8081	0.1842	250	41.664	0.0401	38.2283	0.481635	4.81635	92.8849	7.11511	9.28287	2.02086
5	Feed	B	33	38.5761	2.0995	40.5247	1.9486	38.7511	0.175	250	38.6128	0.0367	56.4984	0.724859	7.24859	92.8126	7.18743	8.98081	1.8834
6	Feed	B	26	44.2278	1.9531	46.0429	1.8151	44.3892	0.1614	250	44.2624	0.0346	43.7542	0.602642	6.02642	92.9343	7.06569	8.89207	1.90623
7	Feed	C	6 (F-5)	41.2597	1.8824	43.0146	1.7549	41.4002	0.1405	250	41.2891	0.0294	24.3933	0.347503	3.47503	93.2267	6.77327	8.00615	1.67531
8	Feed	C	18	42.0032	2.2365	44.0878	2.0846	42.1662	0.163	250	42.0338	0.0306	57.1547	0.685439	6.85439	93.2081	6.79186	7.81925	1.46791
9	Feed	C	35 (D-17)	40.9418	2.0165	42.8222	1.8804	41.0869	0.1451	250	40.9756	0.0338	53.4788	0.711003	7.11003	93.2507	6.74932	7.71644	1.79749
10	Feed	D	2	42.5351	1.8498	44.2347	1.6996	42.697	0.1619	250	42.563	0.0279	44.4117	0.653267	6.53267	91.8802	8.1198	9.52577	1.64156
11	Feed	D	10	39.9003	1.893	41.6383	1.738	40.0685	0.1682	250	39.9337	0.0334	57.1547	0.822133	8.22133	91.8119	8.18806	9.67779	1.92175
12	Feed	D	29	40.1966	1.9207	41.9584	1.7618	40.3609	0.1643	250	40.2241	0.0275	54.398	0.771909	7.71909	91.727	8.27303	9.32569	1.5609
		Diet	Mean % DryMatter	SD	CV(%) DryMatter	Mean %Ash	SD	CV(%) Ash	Mean %AIA	SD	CV(%) AIA	Mean % P	SD	CV (%)	SE (%P)	Mean g/kg P	SD	SE (g/kg P)
		A	93.8112	0.0993186	0.105871	9.47645	0.147824	1.55991	2.33646	0.0461433	1.97492	0.850344	0.0783755	9.21691	0.0452501	8.50344	0.783755	0.452501
		B	92.8773	0.0612257	0.065921	9.05192	0.204874	2.26332	1.93683	0.0736626	3.80325	0.603045	0.121612	20.1664	0.070213	6.03045	1.21612	0.70213
		C	93.2285	0.0213282	0.0228773	7.84728	0.146876	1.87168	1.6469	0.166617	10.117	0.698221	0.0180767	2.58897	0.0127822	6.98221	0.180767	0.127822
		D	91.8064	0.0767659	0.0836172	9.50975	0.176596	1.857	1.60123	0.0570346	3.56192	0.749103	0.086712	11.5754	0.0500632	7.49103	0.86712	0.500632

## Sheet: Ingredient
Sample #	Type	Ingredient	Crucible #	Empty Cup (g)	Wet Sample (g)	Dry Sample with Cup (g)	Dry Sample (g)	Ash with Cup (g)	Ash (g)	mg P/L H20	Digestion Volume	% Phosphorus	g P/kg Ingredient	% Dry Matter	% Moisture	% Ash
1	Ingredient	Fish Meal	20	19.8464	2.021	21.7216	1.8752	20.272	0.4256	147.729	250	1.96951	19.6951	92.7857	7.21425	22.6962
2	Ingredient	Fish Meal	6	18.0557	2.0946	20.0001	1.9444	18.4909	0.4352	23.8657	250	0.306852	3.06852	92.8292	7.17082	22.3822
3	Ingredient	Fish Meal	5	17.3466	2.0664	19.2638	1.9172	17.7841	0.4375	147.729	250	1.92637	19.2637	92.7797	7.22029	22.8197
4	Ingredient	Spirulina	25	16.5788	2.0385	18.4656	1.8868	16.7221	0.1433	41.9128	250	0.555342	5.55342	92.5583	7.44175	7.59487
5	Ingredient	Spirulina	17	17.7682	2.1899	19.7861	2.0179	17.922	0.1538	33.4882	250	0.414889	4.14889	92.1458	7.85424	7.62179
6	Ingredient	Spirulina	14	18.8969	2.0082	20.7563	1.8594	19.0384	0.1415	34.2785	250	0.460881	4.60881	92.5904	7.40962	7.60998
7	Ingredient	Chlorella	23	18.7482	2.0807	20.7343	1.9861	18.8467	0.0985	46.6468	250	0.587166	5.87166	95.4535	4.54655	4.95947
8	Ingredient	Chlorella	15	19.2341	2.123	21.2607	2.0266	19.3374	0.1033	46.7454	250	0.576648	5.76648	95.4593	4.54074	5.09721
9	Ingredient	Chlorella	3	21.6427	2.0155	23.5693	1.9266	21.7365	0.0938	44.8062	250	0.581415	5.81415	95.5892	4.41082	4.86868
10	Ingredient	Schizochytrium	13	16.2019	2.0614	18.2316	2.0297	16.397	0.1951	48.0926	250	0.592361	5.92361	98.4622	1.53779	9.61226
11	Ingredient	Schizochytrium	22	22.9393	2.0375	24.9467	2.0074	23.1323	0.193	41.5839	250	0.517882	5.17882	98.5227	1.4773	9.61443
12	Ingredient	Schizochytrium	12	17.3739	2.0034	19.3497	1.9758	17.5641	0.1902	34.4102	250	0.435395	4.35395	98.6223	1.37766	9.62648
				Ingredient	Mean % Dry Matter	SD	CV (%)	Mean % Ash	SD	CV(%)	Mean %P	SD	CV (%)	SE (%P)	Mean g/kg P	SD	SE (g/kg P)
				Fish Meal	92.7982	0.0269862	0.0290805	22.6327	0.225564	0.996627	1.94794	0.947728	48.6528	0.547171	19.4794	0.305088	0.21573
				Spirulina	92.4315	0.247948	0.268251	7.60888	0.0134916	0.177313	0.477037	0.0716066	15.0107	0.0413421	4.77037	0.716066	0.413421
				Chlorella	95.5006	0.0767439	0.0803596	4.97512	0.115064	2.3128	0.581743	0.00526678	0.905344	0.00304078	5.81743	0.0526678	0.0304078
				Schizochytrium	98.5358	0.0808598	0.0820614	9.61772	0.00766241	0.0796697	0.515213	0.0785171	15.2397	0.0453319	5.15213	0.785171	0.453319

## Sheet: Feces
Sample #	Type	Diet	Tank #	Crucible	Empty Cup (g)	Wet Sample (g)	Dry Sample with Cup (g)	Dry Sample (g)	Ash with Cup (g)	Ash (g)	Digestion Volume	AIA with cup (g)	AIA (g)	mg P/L H20	% Phosphorus	% Dry Matter	% Moisture	% Ash	% AIA
1	Feces	D	1	2	42.6015	0.8809	43.4087	0.8072	42.7717	0.1702	250	42.6665	0.065	15.0217	0.465241	91.6336	9.13033	21.0852	8.05253
2	Feces	D	1	8	37.4871	0.8688	38.2725	0.7854	37.6482	0.1611	250	37.5488	0.0617	26.899	0.856219	90.4006	10.6188	20.5118	7.85587
3	Feces	D	1	16	42.3208	0.9403	43.1701	0.8493	42.4952	0.1744	250	42.3943	0.0735	22.8103	0.671445	90.3222	10.7147	20.5346	8.65419
4	Feces	A	2	4	44.3785	0.899	45.1723	0.7938	44.5858	0.2073	250	44.4616	0.0831	37.8335	1.19153	88.2981	13.2527	26.1149	10.4686
5	Feces	A	2	11(F-5)	42.981	1.0345	43.8932	0.9122	43.2288	0.2478	250	43.0818	0.1008	39.2154	1.07475	88.1779	13.4071	27.1651	11.0502
6	Feces	A	2	5(F-5)	42.0373	0.9604	42.8861	0.8488	42.2607	0.2234	250	42.1228	0.0855	43.3596	1.27709	88.3798	13.148	26.3195	10.073
7	Feces	C	3	NO MARK(E-49)	43.4143	0.9094	44.2743	0.86	43.5975	0.1832	250	43.4854	0.0711	37.636	1.09407	94.5678	5.74419	21.3023	8.26744
8	Feces	C	3	7(D-17)	41.6109	1.0139	42.5562	0.9453	41.8074	0.1965	250	41.6959	0.085	32.4344	0.85778	93.234	7.25696	20.7871	8.99185
9	Feces	C	3	3(F-5)NO MARK	43.6161	1.0048	44.5647	0.9486	43.8205	0.2044	250	43.696	0.0799	34.6736	0.913809	94.4068	5.92452	21.5475	8.42294
10	Feces	A	4	32(D-17)	43.3741	0.926	44.2607	0.8866	43.5858	0.2117	250	43.4784	0.1043	39.8076	1.12248	95.7451	4.44394	23.8777	11.764
11	Feces	A	4	27(E-49)	38.8239	0.9621	39.7415	0.9176	39.0534	0.2295	250	38.9355	0.1116	30.8533	0.840598	95.3747	4.84961	25.0109	12.1622
12	Feces	A	4	NO MARK(0)	33.4013	1.0018	34.3578	0.9565	33.6356	0.2343	250	33.511	0.1097	48.3555	1.26387	95.4781	4.73602	24.4956	11.4689
13	Feces	D	5	34(F-47	40.1116	0.9974	41.0296	0.918	40.3041	0.1925	250	40.185	0.0734	26.6353	0.725361	92.0393	8.64924	20.9695	7.99564
14	Feces	D	5	25(0)	36.619	0.9544	37.4964	0.8774	36.7998	0.1808	250	36.689	0.07	24.3933	0.695046	91.9321	8.77593	20.6063	7.97812
15	Feces	D	5	1(0)	41.4166	1.1142	42.4428	1.0262	41.6308	0.2142	250	41.5037	0.0871	25.6512	0.624907	92.102	8.57533	20.8731	8.48762
16	Feces	C	6	29	40.1977	0.9463	41.117	0.9193	40.3618	0.1641	250	40.2676	0.0699	24.9209	0.677714	97.1468	2.93702	17.8505	7.60361
17	Feces	C	6	2	42.5363	1.0365	43.5408	1.0045	42.7123	0.176	250	42.6185	0.0822	25.4485	0.633361	96.9127	3.18566	17.5212	8.18318
18	Feces	C	6	10	39.901	0.9665	40.8366	0.9356	40.0712	0.1702	250	39.9738	0.0728	32.0391	0.856112	96.8029	3.30269	18.1915	7.7811
19	Feces	A	7	21	41.8623	0.9596	42.6639	0.8016	42.08	0.2177	250	41.9589	0.0966	43.3596	1.35228	83.5348	19.7106	27.1582	12.0509
20	Feces	A	7	20	46.2813	1.1233	47.254	0.9727	46.5537	0.2724	250	46.4238	0.1425	39.5444	1.01636	86.5931	15.4827	28.0045	14.6499
21	Feces	A	7	33	38.5763	1.0576	39.4624	0.8861	38.8204	0.2441	250	38.6787	0.1024	51.3774	1.44954	83.784	19.3545	27.5477	11.5563
22	Feces	B	8	22	42.0436	1.06	42.9824	0.9388	42.2809	0.2373	250	42.1379	0.0943	44.1487	1.17567	88.566	12.9101	25.2769	10.0447
23	Feces	B	8	24	38.6439	0.9268	39.4679	0.824	38.8469	0.203	250	38.7346	0.0907	36.7803	1.11591	88.9081	12.4757	24.6359	11.0073
24	Feces	B	8	15	45.6674	0.9402	46.5035	0.8361	45.8686	0.2012	250	45.7636	0.0962	1.93196	0.0577671	88.9279	12.4507	24.0641	11.5058
25	Feces	C	9	35	40.9424	0.9255	41.732	0.7896	41.1061	0.1637	250	41.0055	0.0631	36.122	1.14368	85.316	17.2112	20.732	7.99139
26	Feces	C	9	19(1')	39.2312	0.9983	40.0958	0.8646	39.4068	0.1756	250	39.3002	0.069	33.6199	0.972123	86.6072	15.4638	20.31	7.98057
27	Feces	C	9	18	42.0036	0.96	42.8452	0.8416	42.1628	0.1592	250	42.0684	0.0648	29.9308	0.889105	87.6667	14.0684	18.9163	7.69962
28	Feces	B	10	NO MARK(F-5)	41.2604	1.1434	42.3509	1.0905	41.5117	0.2513	250	41.3822	0.1218	31.7756	0.728465	95.3734	4.85099	23.0445	11.1692
29	Feces	B	10	12	41.6243	1.0869	42.6653	1.041	41.8668	0.2425	250	41.7375	0.1132	23.47	0.56364	95.777	4.40922	23.2949	10.8742
30	Feces	B	10	14	35.8958	0.9217	36.7776	0.8818	36.103	0.2072	250	35.9895	0.0937	34.4102	0.975566	95.671	4.52484	23.4974	10.626
31	Feces	D	11	2	43.617	1.0002	44.503	0.886	43.7977	0.1807	250	43.6897	0.0727	26.2397	0.740397	88.5823	12.8894	20.395	8.20542
32	Feces	D	11	25	36.6192	1.035	37.5341	0.9149	36.8066	0.1874	250	36.6944	0.0752	28.6128	0.781856	88.3961	13.1271	20.4831	8.21948
33	Feces	D	11	4	44.3794	1.0068	45.2722	0.8928	44.5638	0.1844	250	44.4501	0.0707	26.5034	0.742143	88.677	12.7688	20.6541	7.91891
34	Feces	B	12	32	42.6014	1.022	43.5626	0.9612	42.8132	0.2118	250	42.7019	0.1005	27.0308	0.703049	94.0509	6.32543	22.035	10.4557
35	Feces	B	12	16	42.3219	1.0033	43.2658	0.9439	42.525	0.2031	250	42.4202	0.0983	39.1496	1.03691	94.0795	6.29304	21.5171	10.4142
36	Feces	B	12	12	33.4016	1.0101	34.3518	0.9502	33.6145	0.2129	250	33.5021	0.1005	32.3026	0.84989	94.0699	6.30394	22.4058	10.5767
			Tank	Mean %DryMatter	SD	CV(%) DryMatter	Mean %Ash	SD	CV(%) Ash	Mean %AIA	SD	CV(%) AIA	mean %P	SD	CV (%)
			1	0.813967	0.032483	3.9907	20.7105	0.324689	1.56775	8.18753	0.415928	5.08002	0.664302	0.195587	29.4425
			2	0.8516	0.0592496	6.95745	26.5332	0.556749	2.09831	10.5306	0.491523	4.66756	1.18112	0.10157	8.59944
			3	0.917967	0.0502277	5.47163	21.2123	0.388155	1.82986	8.56075	1.41179	16.4914	0.95522	0.123468	12.9257
			4	0.920233	0.0350243	3.80603	24.4614	0.567353	2.31938	11.7984	0.381361	3.23232	1.07565	0.215485	20.033
			5	0.940533	0.0769167	8.17798	20.8163	0.188127	0.903747	8.15379	0.289238	3.54728	0.681771	0.051526	7.55766
			6	0.953133	0.0452253	4.7449	17.8544	0.335207	1.87745	7.85596	0.296946	3.77988	0.722396	0.117906	16.3215
			7	0.8868	0.0855521	9.64729	27.5701	0.423616	1.5365	12.0509	n/a (1 value)	#VALUE!	1.27273	0.227285	17.8581
			8	0.8663	0.0630777	7.28127	24.659	0.60675	2.46056	11.2565	0.352506	3.13157	0.783115	0.62888	80.3049		0.783115
			9	0.831933	0.0384231	4.61853	19.9861	0.950171	4.75415	7.89053	0.165418	2.09641	1.00164	0.129829	12.9617
			10	1.00443	0.109049	10.8568	23.2789	0.226881	0.97462	10.8898	0.271935	2.49716	0.75589	0.207328	27.4283
			11	0.8979	0.0151099	1.68281	20.5108	0.131737	0.642285	8.1146	0.169622	2.09033	0.754799	0.0234485	3.1066
			12	0.951767	0.00875576	0.919948	21.986	0.446371	2.03026	10.4822	0.084428	0.805441	0.863284	0.167334	19.3834
			Diet	Mean %P in Feces	SD	CV (%)	Mean % AIA in Feces	SD	CV (%)
			A	1.1765	0.0986208	8.38257	11.46	0.814673	7.10886
			B	0.809587	0.0558295	6.89604	10.8762	0.387343	3.56139
			C	0.893084	0.149631	16.7544	8.10241	0.397305	4.90354
			D	0.700291	0.0480068	6.85527	8.15197	0.0364975	0.447714

## Sheet: WBF
Sample #	Type	Diet	Tank #	Crucible #	Empty Cup (g)	Wet Sample (g)	Dry Sample with Cup (g)	Dry Sample (g)	Ash with Cup (g)	Ash (g)	Digestion Volume	mg P/L H20	% Phosphorus	% Dry Matter	% Moisture	% Ash
1	WBF		Initial	15	45.668	1.9436	47.575	1.907	46.0349	0.3669	250	147.729	1.93667	98.1169	1.8831	19.2396
2	WBF		Initial	12	39.2307	1.9499	41.1389	1.9082	39.5808	0.3501	250	151.61	1.9863	97.8614	2.13857	18.3471
3	WBF		Initial	24	38.6429	2.0517	40.6551	2.0122	39.0168	0.3739	250	195.428	2.42803	98.0748	1.92523	18.5817
4	WBF	D	1	14	35.896	1.9678	37.8462	1.9502	36.2445	0.3485	250	125.173	1.60462	99.1056	0.8944	17.87
5	WBF	D	1	15	45.6678	1.9846	47.6352	1.9674	46.0143	0.3465	250	145.141	1.84432	99.1333	0.866673	17.6121
6	WBF	D	1	33	38.5768	2.0806	40.6399	2.0631	38.9174	0.3406	250	129.197	1.56557	99.1589	0.841104	16.5091
7	WBF	A	2	10	39.9015	1.8291	41.7039	1.8024	40.2755	0.374	250	151.61	2.10289	98.5403	1.45973	20.7501
8	WBF	A	2	19	39.2312	1.8885	41.0894	1.8582	39.6333	0.4021	250	176.134	2.36969	98.3956	1.60445	21.6392
9	WBF	A	2	20	46.2966	1.8982	48.1668	1.8702	46.7078	0.4112	250	178.71	2.38892	98.5249	1.47508	21.987
10	WBF	C	3	29	40.1978	1.8542	42.0227	1.8249	40.5826	0.3848	250	98.3647	1.34754	98.4198	1.5802	21.0861
11	WBF	C	3	24	38.644	1.9377	40.5418	1.8978	39.0237	0.3797	250	209.538	2.76028	97.9409	2.05914	20.0074
12	WBF	C	3	12	41.6245	1.9106	43.5009	1.8764	42.0065	0.382	250	156.781	2.08885	98.21	1.79001	20.3581
13	WBF	A	4	11	42.9825	1.9054	44.8485	1.866	43.3155	0.333	250	156.781	2.1005	97.9322	2.06781	17.8457
14	WBF	A	4	1	41.4171	1.9412	43.3206	1.9035	41.7441	0.327	250	155.489	2.04214	98.0579	1.9421	17.1789
15	WBF	A	4	8	37.488	1.9417	39.3891	1.9011	37.8351	0.3471	250	129.717	1.70581	97.909	2.09095	18.2579
16	WBF	D	5	13	42.038	1.9532	43.9426	1.9046	42.3453	0.3073	250	124.394	1.63281	97.5118	2.48822	16.1346
17	WBF	D	5	26	44.228	1.9721	46.1503	1.9223	44.5406	0.3126	250	127.51	1.6583	97.4748	2.52523	16.2618
18	WBF	D	5	7	41.6115	1.9833	43.542	1.9305	41.9406	0.3291	250	96.7996	1.25356	97.3378	2.66223	17.0474
19	WBF	C	6	27	38.8239	1.9483	40.7068	1.8829	39.1673	0.3434	250	128.029	1.69989	96.6432	3.35677	18.2378
20	WBF	C	6	34	40.1123	1.9449	41.9903	1.878	40.4816	0.3693	250	109.44	1.45687	96.5602	3.43977	19.6645
21	WBF	C	6	5	43.4151	1.9497	45.2996	1.8845	43.7678	0.3527	250	151.61	2.01128	96.6559	3.3441	18.7158
22	WBF	A	7	18	42.0037	1.829	43.797	1.7933	42.4731	0.4694	250	150.317	2.09553	98.0481	1.95189	26.1752
23	WBF	A	7	6	41.2603	1.8307	43.0565	1.7962	41.7403	0.48	250	173.069	2.40882	98.1155	1.88453	26.7231
24	WBF	A	7	21	41.8624	1.8945	43.7207	1.8583	42.3803	0.5179	250	197.351	2.65499	98.0892	1.91079	27.8696
25	WBF	B	8	22	42.0429	1.8399	43.8372	1.7943	42.4236	0.3807	250	104.752	1.45951	97.5216	2.4784	21.2172
26	WBF	B	8	2	42.5363	1.8381	44.3338	1.7975	42.9084	0.3721	250	170.979	2.37801	97.7912	2.2088	20.701
27	WBF	B	8	35	40.9421	2.0483	42.9425	2.0004	41.3984	0.4563	250	182.572	2.28169	97.6615	2.33852	22.8104
28	WBF	C	9	12	44.2271	1.9537	46.1262	1.8991	44.62	0.3929	250	167.11	2.19986	97.2053	2.7947	20.6887
29	WBF	C	9	11	42.9817	1.9312	44.8629	1.8812	43.3755	0.3938	250	159.365	2.11786	97.4109	2.58906	20.9334
30	WBF	C	9	10	36.6187	1.9445	38.5133	1.8946	37.0231	0.4044	250	176.134	2.32416	97.4338	2.56621	21.3449
31	WBF	B	10	9	42.6011	1.9704	44.5101	1.909	43.0202	0.4191	250	164.259	2.15111	96.8839	3.11612	21.9539
32	WBF	B	10	8	43.4148	2.0161	45.366	1.9512	43.8382	0.4234	250	139.96	1.79326	96.7809	3.21909	21.6995
33	WBF	B	10	7	38.8235	2.0353	40.7856	1.9621	39.2965	0.473	250	209.538	2.66982	96.4035	3.59652	24.1068
34	WBF	D	11	6	41.4166	2.0558	43.426	2.0094	41.781	0.3644	250	146.86	1.82716	97.743	2.25703	18.1348
35	WBF	D	11	5	41.6107	1.9977	43.5602	1.9495	41.9493	0.3386	250	155.489	1.99396	97.5872	2.41277	17.3686
36	WBF	D	11	4	37.4875	1.9739	39.41	1.9225	37.8297	0.3422	250	152.292	1.98039	97.396	2.60398	17.7997
37	WBF	B	12	3	42.0377	1.9058	43.8801	1.8424	42.4569	0.4192	250	174.846	2.37253	96.6733	3.32669	22.7529
38	WBF	B	12	2	40.1122	1.9797	42.0277	1.9155	40.5545	0.4423	250	186.054	2.42827	96.7571	3.24292	23.0906
39	WBF	B	12	1	33.4012	1.9866	35.3227	1.9215	33.8443	0.4431	250	144.387	1.87857	96.723	3.27696	23.0601
			Tank	Mean %DryMatter	SD	CV (%)	Mean %Ash	SD	CV(%)	mean %P	SD	CV(%)	%P Excluding Outliers	SD excluding outliers
			Initial	98.0177	0.136962	0.139732	18.7228	0.462696	2.4713	2.117	0.270503	12.7777
			1	99.1326	0.0266554	0.0268887	17.3304	0.722822	4.17083	1.6715	0.150931	9.02968
			2	98.4869	0.0794913	0.0807126	21.4588	0.637863	2.9725	2.28716	0.159874	6.99004
			3	98.1902	0.240084	0.244509	20.4839	0.550237	2.6862	2.06556	0.70666	34.2116	2.08885	n/a (one value)
			4	97.9664	0.0800999	0.0817626	17.7608	0.544468	3.06556	1.94948	0.213035	10.9278
			5	97.4414	0.0916667	0.0940736	16.4813	0.494391	2.99972	1.51489	0.226678	14.9633
			6	96.6198	0.0519606	0.0537784	18.8727	0.726181	3.84778	1.72268	0.277906	16.1322
			7	98.0843	0.0339513	0.0346145	26.9226	0.864619	3.2115	2.38645	0.280398	11.7496
			8	97.6581	0.134828	0.138062	21.5762	1.0996	5.09637	2.03974	0.504798	24.7482	2.32985	0.0681086
			9	97.35	0.125839	0.129264	20.989	0.331576	1.57976	2.21396	0.103869	4.69155
			10	96.6894	0.252932	0.261592	22.5867	1.32257	5.85553	2.20473	0.440735	19.9904	2.15111	n/a (one value)
			11	97.5754	0.173778	0.178096	17.7677	0.38411	2.16184	1.93383	0.0926299	4.78996
			12	96.7178	0.0421299	0.0435596	22.9679	0.186767	0.813166	2.22645	0.302567	13.5896
REAL DRY MATTER:
Sample #	Type	Diet	Tank #	Crucible #	Empty Cup (g)	Wet Sample (g)	Dry Sample with Cup (g)	Dry Sample (g)	% Dry Matter
1	WBF	A	4	0(10?)	37.4902	2.1182	38.3092	0.819	38.6649
2	WBF	A	4	35(D-17)	40.9446	1.862	41.4221	0.4775	25.6445
3	WBF	A	4	0(very blurry)	33.4035	2.7102	34.3955	0.992	36.6025
4	WBF	D	5	E-49	43.4176	2.827	44.261	0.8434	29.8337
5	WBF	D	5	11(F-5)	42.9846	2.4761	43.7707	0.7861	31.7475
6	WBF	D	5	1?(0 not blurry)	41.4196	2.3968	42.178	0.7584	31.6422
7	WBF	C	6	2 (F-5)	42.5386	1.7154	42.94	0.4014	23.3998
8	WBF	C	6	21(F-47	41.8646	1.6543	42.2207	0.3561	21.5257
9	WBF	C	6	D-17(7?)	41.6137	2.6453	42.2649	0.6512	24.6172
10	WBF	B	8	20(B-13)	46.2992	2.0128	46.841	0.5418	26.9177
11	WBF	B	8	10(F-47)	39.9037	2.7643	40.5875	0.6838	24.7368
12	WBF	B	8	33(E-49)	38.579	2.8589	39.3195	0.7405	25.9016
13	WBF	C	9	(F-5)	41.2627	2.3986	41.9029	0.6402	26.6906
14	WBF	C	9	1'(E-49)	39.2337	2.7331	39.8311	0.5974	21.858
15	WBF	C	9	27(E-49)	38.8264	2.8872	39.5744	0.748	25.9075
16	WBF	D	11	34(F-47)	40.1151	1.8875	40.7169	0.6018	31.8834
17	WBF	D	11	22(F-5)	42.0457	2.0978	42.6231	0.5774	27.5241
18	WBF	D	11	25(blurry 0)	36.6219	2.5041	37.3539	0.732	29.2321
19	WBF	B	12	29(D-16)	40.2004	2.6207	40.8446	0.6442	24.5812
20	WBF	B	12	18(F-5)	42.0068	2.9715	42.8721	0.8653	29.12
			Tank	Mean %DryMatter	SD	CV (%)
			4	33.6373	6.99837	20.8054
			5	31.0745	1.0758	3.462
			6	23.1809	1.55734	6.7182
			8	25.852	1.0913	4.22131
			9	24.8187	2.59377	10.4509
			11	29.5465	2.19663	7.43449
			12	26.8506	3.20938	11.9527
			diet	Mean %DM	SE
			A	33.6373	4.04051
			B	26.2515	0.833023
			C	23.9998	0.862731
			D	30.3105	0.718031
			Total Average:	28.5498

## Sheet: Digestibility
Diet	Tank	Mean g/kg P in Feed	g/kg P in Feces	Mean g/kg AIA Feed	% AIA Feces	Feed ADC of P	g/kg of P digested in feed		Ingredients	Tank	Mean g/kg P in Ingredient	Mean g/kg P in Feed	Feed ADC	Ingredient ADC of P	g/kg of p digested in ingredient
Diet A (fishmeal)	2	8.50344	11.8112	23.3646	105.306	69.182	5.88285		Fishmeal	2	19.4794	8.50344	69.182	66.6128	12.9758
Diet A (fishmeal)	4	8.50344	10.7565	23.3646	117.984	74.9498	6.37331		Fishmeal	4	19.4794	8.50344	74.9498	78.2555	15.2437
Diet A (fishmeal)	7	8.50344	12.7273	23.3646	120.509	70.9812	6.03584		Fishmeal	7	19.4794	8.50344	70.9812	70.2446	13.6832	**don't report fishmeal ingredient ADC or digested P
Diet A (fishmeal) Mean						71.7043	6.09734		Fishmeal Mean					71.7043	13.9676
Diet A (fishmeal) SE						1.70381	0.144882		Fishmeal SE					3.43928	0.66995	%CV for ADC	4.79647
Diet B (Spirulina)	8	6.03045	7.83115	19.3683	112.565	77.6559	4.683		Spirulina	8	4.77037	6.03045	77.6559	102.41	4.88535
Diet B (Spirulina)	10	6.03045	7.5589	19.3683	108.898	77.7063	4.68604		Spirulina	10	4.77037	6.03045	77.7063	102.67	4.89776
Diet B (Spirulina)	12	6.03045	8.63284	19.3683	104.822	73.549	4.43534		Spirulina	12	4.77037	6.03045	73.549	81.2214	3.87456
Diet B (Spirulina) Mean						76.3037	4.60146		Spirulina Mean					95.434	4.55256
Diet B (Spirulina) SE						1.37746	0.0830672		Spirulina SE					7.10672	0.339017	%CV for ADC	7.44674
Diet C (Chlorella)	3	6.98221	9.5522	16.469	85.6075	73.6812	5.14458		Chlorella	3	5.81743	6.98221	73.6812	80.4236	4.67859
Diet C (Chlorella)	6	6.98221	7.22396	16.469	78.5596	78.3104	5.4678		Chlorella	6	5.81743	6.98221	78.3104	100.842	5.8664
Diet C (Chlorella)	9	6.98221	10.0164	16.469	78.9053	70.0581	4.89161		Chlorella	9	5.81743	6.98221	70.0581	64.4435	3.74895
Diet C (Chlorella) Mean						74.0166	5.168		Chlorella Mean					81.903	4.76465
Diet C (Chlorella) SE						2.38814	0.166745		Chlorella SE					10.5333	0.612767	%CV for ADC	12.8607
Diet D (Schizochytrium)	1	7.49103	6.64302	16.0123	81.8753	82.6569	6.19186		Schizochytrium	1	5.15213	7.49103	82.6569	124.837	6.43174
Diet D (Schizochytrium)	5	7.49103	6.94046	16.0123	81.5379	81.8055	6.12807		Schizochytrium	5	5.15213	7.49103	81.8055	120.706	6.21893
Diet D (Schizochytrium)	11	7.49103	7.54799	16.0123	81.146	80.1172	6.0016		Schizochytrium	11	5.15213	7.49103	80.1172	112.516	5.79698
Diet D (Schizochytrium) Mean						81.5265	6.10718		Schizochytrium Mean					119.353	6.14922
Diet D (Schizochytrium) SE						0.746301	0.0559056		Schizochytrium SE					3.62038	0.186527	%CV for ADC	3.03334
Mean						Mean
Diet	g P/kg Diet	Feed ADC of P	Digestible P (g/kg)			Ingredient	g P/kg Ingredient	Ingredient ADC of P	Digestible P (g/kg)
A (Fishmeal)	8.50344	71.7043	6.09734			Spirulina	4.77037	95.434	4.55256
B (Spirulina)	6.03045	76.3037	4.60146			Chlorella	5.81743	81.903	4.76465
C (Chlorella)	6.98221	74.0166	5.168			Schizochytrium	5.15213	119.353	6.14922
D (Schizochytrium)	7.49103	81.5265	6.10718
SE						SE
Diet	g P/kg Diet	Feed ADC of P	Digestible P (g/kg)			Ingredient	g P/kg Ingredient	Ingredient ADC of P	Digestible P (g/kg)
Diet A (Fishmeal) SE	0.452501	1.70381	0.144882			Spirulina SE	0.413421	7.10672	0.339017
Diet B (Spirulina) SE	0.70213	1.37746	0.0830672			Chlorella SE	0.0304078	10.5333	0.612767
Diet C (Chlorella) SE	0.127822	2.38814	0.166745			Schizochytrium SE	0.453319	3.62038	0.186527
Diet D (Schizochytrium) SE	0.500632	0.746301	0.0559056

## Sheet: Phosphorus Budget
Diet	Tank	# Fish	Initial mean weight/fish (g)	Final mean weight/fish (g)	Initial dry weight/fish (g)	Final dry weight/fish (g)	WBF Dry Matter (%)	Total Feed (g)	Feed/Fish (g)	Feed DM (%)	Feed/Fish dry weight (g)	WBF Phosphorus (%DM)	Initial fish phosphorus (g)	Final fish phosphorus (g)	Feed Phosphorus (%DM)	Intake phosphorus (g/fish)	intake phosphorus (g/kg)	retained phosphorus (g/fish)	retained P (g/kg)	Rejected phosphorus (g/kg)	Diet ADC of P (%)	Diet ADC of P (coefficient)	Dissolved phosphorus (g/kg)	Solid phosphorus (g/kg)	Total P load (g/kg)	P retention (%)
A	2	12	21.6	35.5	6.16675	10.1352	28.5498	268.163	22.3469	93.8112	20.9639	2.28716	0.13055	0.231808	0.850344	0.178265	44.921	0.101258	25.5159	19.405	69.182	0.69182	5.56131	13.8437	19.405	56.8018
A	4	14	20.5	35.8571	5.8527	10.2371	28.5498	274.925	19.6375	93.8112	18.4222	1.94948	0.123902	0.199571	0.850344	0.156652	35.7292	0.0756693	17.2586	18.4705	74.9498	0.749498	9.52028	8.95024	18.4705	48.3041
A	7	15	22	35.3333	6.28095	10.0876	28.5498	271.456	18.0971	93.8112	16.9771	2.38645	0.132968	0.240735	0.850344	0.144364	37.9242	0.107767	28.3104	9.61389	70.9812	0.709812	-1.39128	11.0052	9.61389	74.6498
B	8	15	22.8	32.9333	6.50934	9.40239	28.5498	275.337	18.3558	92.8773	17.0484	2.32985	0.137803	0.219062	0.603045	0.10281	35.5368	0.0812588	28.0877	7.44915	77.6559	0.776559	-0.491227	7.94038	7.44915	79.0382
B	10	15	20.5	35.2	5.8527	10.0495	28.5498	278.656	18.5771	92.8773	17.2539	2.15111	0.123902	0.216177	0.603045	0.104049	24.7923	0.0922749	21.9869	2.80542	77.7063	0.777063	-2.7217	5.52712	2.80542	88.6843
B	12	15	21.7	35.4667	6.1953	10.1256	28.5498	272.456	18.1638	92.8773	16.87	2.22645	0.131154	0.225443	0.603045	0.101734	25.8841	0.0942884	23.9898	1.8943	73.549	0.73549	-4.95232	6.84662	1.8943	92.6816
C	3	15	22.5	35.7333	6.4237	10.2018	28.5498	269.337	17.9558	93.2285	16.74	2.08885	0.13599	0.2131	0.698221	0.116882	30.9368	0.0771106	20.41	10.5269	73.6812	0.736812	2.38465	8.14221	10.5269	65.9731
C	6	15	22.5	36.2667	6.4237	10.354	28.5498	277.588	18.5058	93.2285	17.2527	1.72268	0.13599	0.178367	0.698221	0.120462	30.6492	0.0423774	10.7821	19.8671	78.3104	0.783104	13.2194	6.64768	19.8671	35.179
C	9	15	20.5	31.0667	5.8527	8.86946	28.5498	275.656	18.3771	93.2285	17.1327	2.21396	0.123902	0.196366	0.698221	0.119624	39.6532	0.0724645	24.0207	15.6325	70.0581	0.700581	3.75961	11.8729	15.6325	60.5769
D	1	13	22.1	40.7692	6.3095	11.6395	28.5498	243.762	18.751	91.8064	17.2146	1.6715	0.133572	0.194555	0.749103	0.128955	24.1941	0.0609828	11.4414	12.7527	82.6569	0.826569	8.5567	4.19599	12.7527	47.29
D	5	14	21.6	35.7143	6.16675	10.1963	28.5498	274.012	19.5723	91.8064	17.9686	1.51489	0.13055	0.154463	0.749103	0.134604	33.4038	0.023913	5.93435	27.4694	81.8055	0.818055	21.3918	6.07766	27.4694	17.7655
D	11	14	21.7	36.4286	6.1953	10.4003	28.5498	275.869	19.7049	91.8064	18.0904	1.93383	0.131154	0.201124	0.749103	0.135515	32.2274	0.0699695	16.6397	15.5877	80.1172	0.801172	9.18001	6.40771	15.5877	51.6322
	Initial						28.5498					2.117
		Diet	Mean Dissolved P (g/kg)	Mean Solid P (g/kg)	Mean Total P Load (g/kg)	Mean P Retention (%)	SE (Dissolved)	SE (Solid)	SE (Total Load)	SE (% Retention)
		A (Fishmeal)	4.56344	11.2664	15.8298	59.9185	3.18917	1.41865	3.11965	7.76336
		B (Spirulina)	-2.72175	6.77137	4.04963	86.8014	1.28781	0.697663	1.71999	4.04947
		C (Chlorella)	6.45457	8.8876	15.3422	53.9097	3.40564	1.55375	2.7002	9.49397
		D (Schizochytrium)	13.0428	5.56046	18.6033	38.8959	4.17834	0.688852	4.50798	10.6393

## Sheet: Feeding Data
Diet	Tank	Total Feed Consumed 3/4-4/3	Estimated Total Feed Given 2/1-3/3	average feed subtracted per week	Estimated Total Feed Consumed 2/1-3/3	Estimated Total Feed Consumed 2/1-4/3
D	1	101.2	143.8	0.275	142.562	243.762
A	2	126.95	143.8	0.575	141.213	268.163
C	3	126.1	143.8	0.125	143.238	269.337
A	4	131.8	143.8	0.15	143.125	274.925
D	5	131.45	143.8	0.275	142.562	274.012
C	6	134.8	143.8	0.225	142.788	277.588
A	7	128.5	143.8	0.1875	142.956	271.456
B	8	132.1	143.8	0.125	143.238	275.337
C	9	132.25	143.8	0.0875	143.406	275.656
B	10	135.25	143.8	0.0875	143.406	278.656
D	11	132.35	143.8	0.0625	143.519	275.869
B	12	129.05	143.8	0.0875	143.406	272.456
